# Supplementary material
Source: PubMed Central journal article supplement (PMC3140853)
Supplement: Supp_Data.pdf [file Supp_Data.pdf]

Design Failure Mode and Effects Analysis Worksheet

| Item and Function/Requirements | Potential Failure Mode               | Potential Effect(s) of Failure                     | Potential Sub-effect(s) of Failure                                           | Severity Potential Cause(s)/Mechanisms of Failure | Occurrence Current Controls - Prevention                    | Current Controls - Detection         | Detection RPN                               | Recommended Action*             |                              |
|--------------------------------|--------------------------------------|----------------------------------------------------|------------------------------------------------------------------------------|---------------------------------------------------|-------------------------------------------------------------|--------------------------------------|---------------------------------------------|---------------------------------|------------------------------|
| Gravity Pump                   | Leakage of media at tubing interface | Reduced experiment run time                        | Embryo not exposed to growth factor for sufficient time to alter development | 5 Material choice/interface technique             | 1 Material choice                                           | Visual monitoring                    | 3 15                                        | None                            |                              |
|                                |                                      | Increased cost to run experiment                   | Decreased number of test runs                                                | 4 Material choice/interface technique             | 1 Material choice                                           | Visual monitoring                    | 3 12                                        | None                            |                              |
|                                |                                      | Increased man-hours required to monitor experiment | Decreased number of test runs                                                | 4 Material choice/interface technique             | 1 Material choice                                           | Visual monitoring                    | 3 12                                        | None                            |                              |
|                                |                                      | Change in media flow rate                          | Embryo dislodged                                                             | 7 Material choice/interface technique             | 1 Material choice                                           | Visual monitoring                    | 5 35                                        |                                 |                              |
|                                |                                      |                                                    | Not enough nutrient/growth factor delivery                                   | 5 Material choice/interface technique             | 1 Material choice                                           | Sampling of reservoir concentrations | 6 30                                        | None                            |                              |
|                                |                                      |                                                    | Embryo death                                                                 | 8 Material choice/interface technique             | 1 Material choice                                           | Visual monitoring                    | 4 32                                        | Design better sealing mechanism |                              |
|                                |                                      | Absorption of solutes into container wall          | Change in fishwater solute concentration                                     | Unwanted embryo development changes               | 6 Material choice/reduction of nutrients and growth factors | 2 Material choice                    | Visual inspection of embryo post experiment | 9 108                           | Change gravity pump material |
|                                |                                      |                                                    | Embryo death                                                                 | 8 Material choice                                 | 2 Material choice                                           | Visual monitoring                    | 6 96                                        | None                            |                              |
|                                |                                      |                                                    | Change in growth factor concentration                                        | Unwanted embryo development changes               | 4 Material choice/reduction of nutrients and growth factors | 2 Material choice                    | Visual inspection of embryo post experiment | 9 72                            | None                         |
|                                |                                      |                                                    | Embryo death                                                                 | 8 Material choice                                 | 2 Material choice                                           | Visual monitoring                    | 6 96                                        | None                            |                              |
|                                |                                      | Degradation of epoxy/tubing interface              | Addition of new compounds to fishwater                                       | Unwanted embryo development changes               | 6 Material choice/too many solutes in fishwater             | 3 Material choice                    | Visual inspection of embryo post experiment | 6 108                           | None                         |
|                                |                                      |                                                    | Embryo death                                                                 | 8 Material choice                                 | 6 Material choice                                           | Visual monitoring                    | 4 192                                       | None                            |                              |
|                                |                                      |                                                    | Change in media flow rate                                                    | Embryo dislodged                                  | 7 Material choice                                           | 5 Material choice                    | Visual monitoring                           | 4 140                           | None                         |
|                                |                                      |                                                    |                                                                              | Not enough nutrient/growth factor delivery        | 5 Degradation product blocks/denatures growth factor        | 3 Material choice                    | Sampling of reservoir concentrations        | 7 105                           | None                         |
|                                |                                      |                                                    |                                                                              | Embryo death                                      | 8 Degradation product blocks/denatures solutes              | 3 Material choice                    | Visual monitoring                           | 4 96                            | None                         |
|                                |                                      | Degradation of container                           | Addition of new compounds to fishwater                                       | Unwanted embryo development changes               | 6 Material choice                                           | 2 Material choice                    | Visual inspection of embryo post experiment | 5 60                            | None                         |
|                                |                                      |                                                    |                                                                              | Embryo death                                      | 8 Material choice                                           | 1 Material choice                    | Visual monitoring                           | 4 32                            | None                         |
|                                |                                      |                                                    | Change in media flow rate                                                    | Embryo dislodged                                  | 6 Degradation products blocks channel/tubing                | 1 Material choice                    | Visual monitoring                           | 3 18                            | None                         |

**SUPPLEMENTAL FIG. S1.** The final design failure mode and effects analysis worksheet for the micro fluidic zebrafish bioreactor project. This analyzes the issues the students addressed in the course of designing, microfabricating, and testing the bioreactor with and without zebrafish embryos. The levels of severity are relative and assigned after discussion among the students on the team.

Design Failure Mode and Effects Analysis Worksheet

| Item and Function/Requirements | Potential Failure Mode                    | Potential Effect(s) of Failure           | Potential Sub-effect(s) of Failure                                       | Severity Potential Cause(s)/Mechanisms of Failure           | Occurrence Current Controls - Prevention | Current Controls - Detection                | Detection RPN | Recommended Action*         |
|--------------------------------|-------------------------------------------|------------------------------------------|--------------------------------------------------------------------------|-------------------------------------------------------------|------------------------------------------|---------------------------------------------|---------------|-----------------------------|
|                                |                                           |                                          | Not enough nutrient/growth factor delivery                               | 5 Degradation products blocks channel/tubing                | 1 Material choice                        | Sampling of reservoir concentrations        | 5 25          | None                        |
|                                | Media flows too rapidly                   | Loss of growth factor                    | More money to run experiment                                             | 6 Channel too large                                         | 3 Channel mold                           | Visual monitoring                           | 5 90          | Reduce size of channel mold |
|                                |                                           |                                          | Embryo death                                                             | 8 Degradation products blocks channel/tubing                | 3 Material choice                        | Visual monitoring                           | 4 96          | None                        |
| <b>Tubing to Chip</b>          | Leakage of media at tubing/chip interface | Growth factor enters Petri dish          | Unwanted embryo development changes                                      | 6 Material choice/interface technique                       | 2 Material choice                        | Visual inspection of embryo post experiment | 7 84          | None                        |
|                                |                                           |                                          | Embryo death                                                             | 8 Fishwater not delivered to lower channel                  | 2 Material choice                        | Visual monitoring                           | 2 32          | None                        |
|                                |                                           | Overflow of Petri dish                   | Damage to device                                                         | 8 Petri dish too small                                      | 1 Large Petri dish during testing        | Visual monitoring                           | 2 16          | None                        |
|                                |                                           |                                          | Loss of growth factor                                                    | 7 Petri dish too small                                      | 2 Large Petri dish during testing        | Visual monitoring                           | 4 56          | None                        |
|                                |                                           | Reduced flow through channel             | Not enough growth factor delivered to embryo during course of experiment | 6 Material choice/interface technique                       | 3 Material choice                        | Visual monitoring                           | 5 90          | None                        |
|                                |                                           |                                          | Too much growth factor diffuses to embryo                                | 6 Material choice/interface technique                       | 2 Material choice                        | Sampling of reservoir concentrations        | 5 60          | None                        |
|                                | Absorption of solutes into tubing wall    | Change in fishwater solute concentration | Unwanted embryo development changes                                      | 6 Material choice/reduction of nutrients and growth factors | 2 Material choice                        | Visual inspection of embryo post experiment | 8 96          | None                        |
|                                |                                           |                                          | Embryo death                                                             | 8 Material choice/reduction of nutrients and growth factors | 2 Material choice                        | Visual monitoring                           | 4 64          | None                        |
|                                |                                           | Change in growth factor concentration    | Unwanted embryo development changes                                      | 6 Material choice/reduction of nutrients and growth factors | 3 Material choice                        | Visual inspection of embryo post experiment | 8 144         | None                        |
|                                |                                           |                                          | Embryo death                                                             | 8 Material choice/reduction of nutrients and growth factors | 3 Material choice                        | Visual monitoring                           | 4 96          | None                        |
|                                | Degradation of epoxy/tubing interface     | Addition of new compounds to fishwater   | Unwanted embryo development changes                                      | 6 Degradation product blocks/denatures growth factor        | 2 Material choice                        | Visual inspection of embryo post experiment | 8 96          | None                        |
|                                |                                           |                                          | Embryo death                                                             | 8 Degradation product blocks/denatures growth factor        | 2 Material choice                        | Visual monitoring                           | 4 64          | None                        |
|                                |                                           | Change in media flow rate                | Embryo dislodged                                                         | 5 Degradation product blocks channel                        | 2 Material choice                        | Visual monitoring                           | 3 30          | None                        |

SUPPLEMENTAL FIG. S1. (Continued)

Design Failure Mode and Effects Analysis Worksheet

| Item and Function/Requirements | Potential Failure Mode                   | Potential Effect(s) of Failure                      | Potential Sub-effect(s) of Failure           | Safety Potential Cause(s)/Mechanisms of Failure         | Occurrence Current Controls - Prevention | Current Controls - Detection                | Detection RPN | Recommended Action*            |
|--------------------------------|------------------------------------------|-----------------------------------------------------|----------------------------------------------|---------------------------------------------------------|------------------------------------------|---------------------------------------------|---------------|--------------------------------|
|                                |                                          |                                                     | Not enough nutrient/growth factor delivery   | 5 Degradation product blocks channel                    | 2 Material choice                        | Sampling of reservoir concentrations        | 6 60          | None                           |
|                                |                                          |                                                     | Embryo death                                 | 8 Degradation product blocks channel                    | 2 Material choice                        | Visual monitoring                           | 4 64          | None                           |
|                                | Degradation of tubing                    | Addition of new compounds to fishwater              | Unwanted embryo development changes          | 6 Degradation product blocks channel                    | 2 Material choice                        | Visual inspection of embryo post experiment | 8 96          | None                           |
|                                |                                          |                                                     | Embryo death                                 | 8 Degradation product blocks channel                    | 2 Material choice                        | Visual monitoring                           | 4 64          | None                           |
|                                |                                          | Change in media flow rate                           | Embryo dislodged                             | 4 Degradation product blocks channel                    | 3 Material choice                        | Visual monitoring                           | 3 36          | None                           |
|                                |                                          |                                                     | Not enough nutrient/growth factor delivery   | 5 Degradation product blocks channel                    | 3 Material choice                        | Sampling of reservoir concentrations        | 5 75          | None                           |
|                                |                                          |                                                     | Embryo death                                 | 8 Degradation product blocks channel                    | 3 Material choice                        | Visual monitoring                           | 4 96          | None                           |
| <b>Microfluidic Chip</b>       | Degradation of channel by fishwater flow | Altered flow profile                                | Embryo dislodged                             | 7 Flow rate increases pushing embryo out of funnel      | 2 Material choice/flow control           | Visual monitoring                           | 5 70          | Replace old chip with new chip |
|                                |                                          |                                                     | Shear lyses embryo                           | 8 Flow rate increases                                   | 2 Material choice/flow control           | Visual monitoring                           | 6 96          | Replace old chip with new chip |
|                                |                                          |                                                     | Growth factor not delivered to embryo        | 7 Diffusivity too low at high flow rate                 | 3 Material choice/flow control           | Visual inspection of embryo post experiment | 7 147         | Replace old chip with new chip |
|                                |                                          | Leakage of growth factor into surrounding fishwater | Unwanted embryo development changes          | 6 Embryo cannot fully plug funnel                       | 3 Material choice/flow control           | Visual inspection of embryo post experiment | 7 126         | Replace old chip with new chip |
|                                |                                          |                                                     | Not enough growth factor delivered to embryo | 5 Growth factor diffuses into surrounding fishwater     | 3 Material choice/flow control           | Sampling of fishwater concentrations        | 8 120         | Replace old chip with new chip |
|                                |                                          | PDMS enters flow                                    | Embryo dislodged                             | 6 Degradation product pushes embryo out of funnel       | 2 Material choice/flow control           | Visual monitoring                           | 6 72          | Replace old chip with new chip |
|                                |                                          |                                                     | Unwanted embryo development changes          | 5 Degradation product interacts with embryo             | 2 Material choice/flow control           | Visual inspection of embryo post experiment | 8 80          | Replace old chip with new chip |
|                                |                                          |                                                     | Embryo death                                 | 8 Degradation product blocks channel                    | 2 Material choice/flow control           | Visual monitoring                           | 5 80          | Replace old chip with new chip |
|                                | Degradation of funnel by fishwater flow  | Leakage of growth factor into surrounding fishwater | Unwanted embryo development changes          | 5 Degradation product interacts with embryo             | 2 Material choice/flow control           | Visual inspection of embryo post experiment | 8 80          | Fabricate with smoother mold   |
|                                |                                          | Expansion of funnel                                 | Embryo dislodged                             | 8 Degradation reduces surface tension, releasing embryo | 2 Material choice/flow control           | Visual monitoring                           | 3 48          | Fabricate with smoother mold   |

SUPPLEMENTAL FIG. S1. (Continued)

**Design Failure Mode and Effects Analysis Worksheet**

| Item and Function/Requirements | Potential Failure Mode            | Potential Effect(s) of Failure               | Potential Sub-effect(s) of Failure           | Severity Potential Cause(s) of Failure                      | Occurrence Current Controls - Prevention | Current Controls - Detection                | Detection RPN | Recommended Action*              |
|--------------------------------|-----------------------------------|----------------------------------------------|----------------------------------------------|-------------------------------------------------------------|------------------------------------------|---------------------------------------------|---------------|----------------------------------|
|                                |                                   |                                              | Growth factor dispersed around embryo        | 7<br>Growth factor diffuses into surrounding fishwater      | 2<br>Material choice/flow control        | Visual inspection of embryo post experiment | 5<br>70       | Fabricate with smoother mold     |
|                                |                                   | PDMS enters flow                             | Embryo dislodged                             | 6<br>Degradation product pushes embryo out of funnel        | 2<br>Material choice/flow control        | Visual monitoring                           | 4<br>48       | None                             |
|                                |                                   |                                              | Unwanted embryo development changes          | 6<br>Degradation product interacts with embryo              | 2<br>Material choice/flow control        | Visual inspection of embryo post experiment | 8<br>96       | Replace old chip with new chip   |
|                                |                                   |                                              | Embryo death                                 | 8<br>Degradation product interacts with embryo              | 2<br>Material choice/flow control        | Visual monitoring                           | 5<br>80       | Replace old chip with new chip   |
|                                | Embryo lodged too low into funnel | Too much pressure exerted on embryo          | Embryo lysed                                 | 8<br>Funnel exerts too much physical pressure               | 4<br>Insertion guide                     | Visual monitoring                           | 4<br>128      | None - Remove embryo and replace |
|                                |                                   |                                              | Abnormal development occurs                  | 5<br>Physical deformation causes development change         | 3<br>Insertion guide                     | Visual inspection of embryo post experiment | 9<br>135      | None - Remove embryo and replace |
|                                |                                   |                                              | Embryo enters channel                        | 5<br>Pressure pushes embryo through funnel                  | 3<br>Insertion guide                     | Visual monitoring                           | 2<br>30       | None - Remove embryo and replace |
|                                |                                   |                                              | Embryo lyses during removal                  | 9<br>Embryo lodged too low in funnel                        | 2<br>Insertion guide                     | Visual monitoring                           | 6<br>108      | Alter removal method             |
|                                | Funnel too large                  | Embryo enters channel                        | Embryo lost                                  | 9<br>Funnel too large                                       | 2<br>Funnel Mold                         | Visual monitoring                           | 5<br>90       | Reduce size of funnel mold       |
|                                | Embryo lodged too high in funnel  | Embryo does not enter far enough into funnel | Not enough growth factor delivered to embryo | 6<br>Growth factor does not diffuse to embryo               | 6<br>Insertion guide                     | Visual monitoring                           | 6<br>216      | None - Remove embryo and replace |
|                                |                                   |                                              | Embryo dislodged                             | 5<br>Not enough pressure exerted on embryo                  | 5<br>Insertion guide                     | Visual monitoring                           | 2<br>50       | None - Remove embryo and replace |
|                                |                                   |                                              | Embryo lysed                                 | 8<br>Too much shear on embryo                               | 2<br>Insertion guide                     | Visual monitoring                           | 2<br>32       | None - Remove embryo and replace |
|                                | Degradation of PDMS               | Contamination of fishwater                   | Unwanted embryo development changes          | 6<br>Degradation product interacts with embryo              | 3<br>Material choice                     | Visual inspection of embryo post experiment | 8<br>144      | Replace old chip with new chip   |
|                                |                                   |                                              | Embryo death                                 | 8<br>Degradation product interacts with embryo              | 3<br>Material choice                     | Visual monitoring                           | 5<br>120      | Replace old chip with new chip   |
|                                | Bubble forms in channel           | Bubble lodges in funnel                      | Embryo cannot lodge in funnel                | 7<br>Inadequate flushing/Embryo cannot displace bubble      | 5<br>Flushing technique                  | Visual monitoring                           | 3<br>105      | Increase system flush time       |
|                                |                                   |                                              | Fishwater cannot surround embryo             | 8<br>Inadequate flushing/Bubble removes aqueous environment | 5<br>Flushing technique                  | Visual monitoring                           | 4<br>160      | Increase system flush time       |
|                                |                                   |                                              | Embryo death                                 | 8<br>Inadequate flushing/Bubble removes aqueous environment | 5<br>Flushing technique                  | Visual monitoring                           | 4<br>160      | Increase system flush time       |

**SUPPLEMENTAL FIG. S1. (Continued)**

Design Failure Mode and Effects Analysis Worksheet

| Item and Function/Requirements | Potential Failure Mode                    | Potential Effect(s) of Failure                | Potential Sub-effect(s) of Failure                | Severity Potential Cause(s)/Mechanisms of Failure                | Occurrence Current Controls - Prevention                 | Current Controls - Detection                | Detection ICM | Recommended Action*              |
|--------------------------------|-------------------------------------------|-----------------------------------------------|---------------------------------------------------|------------------------------------------------------------------|----------------------------------------------------------|---------------------------------------------|---------------|----------------------------------|
|                                |                                           |                                               | Growth factors not delivered                      | 9 Inadequate flushing/Bubble removes aqueous environment         | 3 Flushing technique                                     | Visual monitoring                           | 7 189         | Increase system flush time       |
|                                |                                           | Flow disrupted                                | Embryo dislodged                                  | 6 Inadequate flushing/Bubble removes aqueous environment         | 5 Flushing technique                                     | Visual monitoring                           | 5 150         | Increase system flush time       |
|                                | Evaporation through chip                  | Fishwater/growth factor concentrations change | Too much growth factor delivered                  | 8 Reduced water concentration raises growth factor concentration | 1 Chip submerged in fishwater                            | Sampling of reservoir concentrations        | 8 64          | Increase channel size            |
|                                |                                           |                                               | pH balance shift causes embryo development change | 4 Chip not stored in proper environment                          | 4 Chip submerged in fishwater                            | Sampling of reservoir concentrations        | 4 64          | None                             |
|                                |                                           |                                               | Embryo death                                      | 8 Chip not stored in proper environment                          | 4 Chip submerged in fishwater                            | Visual monitoring                           | 5 160         | Increase channel size            |
|                                | Chip dries out                            | Dimensions changed                            | Embryo cannot lodge in funnel                     | 7 Chip not stored in proper environment                          | 1 Chip submerged in fishwater/stored in sealed container | Visual monitoring                           | 2 14          | Design improve storage technique |
|                                |                                           |                                               | Embryo falls into channel                         | 7 Chip not stored in proper environment                          | 2 Chip submerged in fishwater/stored in sealed container | Visual monitoring                           | 3 42          | Design improve storage technique |
|                                |                                           |                                               | Flow rate dislodges embryo                        | 7 Chip not stored in proper environment                          | 2 Chip submerged in fishwater/stored in sealed container | Visual monitoring                           | 4 56          | Design improve storage technique |
|                                |                                           |                                               | Not enough growth factor delivered to embryo      | 8 Chip not stored in proper environment                          | 2 Chip submerged in fishwater/stored in sealed container | Sampling of reservoir concentrations        | 8 128         | Design improve storage technique |
|                                |                                           |                                               | Too much growth factor delivered                  | 8 Chip not stored in proper environment                          | 2 Chip submerged in fishwater/stored in sealed container | Sampling of reservoir concentrations        | 8 128         | Design improve storage technique |
|                                |                                           |                                               | Embryo death                                      | 8 Chip not stored in proper environment                          | 2 Chip submerged in fishwater/stored in sealed container | Visual monitoring                           | 5 80          | Design improve storage technique |
|                                |                                           |                                               | Gravity pump disconnects                          | 3 Chip not stored in proper environment                          | 2 Chip submerged in fishwater/stored in sealed container | Visual monitoring                           | 1 6           | None                             |
|                                |                                           |                                               | Reservoir disconnects                             | 2 Chip not stored in proper environment                          | 2 Chip submerged in fishwater/stored in sealed container | Visual monitoring                           | 1 4           | None                             |
| <b>Tubing to Reservoir</b>     | Leakage of media at tubing/chip interface | Growth factor enters Petri dish               | Unwanted embryo development changes               | 4 Material choice/interface technique                            | 2 Material choice                                        | Visual inspection of embryo post experiment | 7 56          | None                             |
|                                |                                           |                                               | Embryo death                                      | 8 Material choice/interface technique                            | 3 Material choice                                        | Visual monitoring                           | 4 96          | None                             |

SUPPLEMENTAL FIG. S1. (Continued)

Design Failure Mode and Effects Analysis Worksheet

| Item and Function/Requirements | Potential Failure Mode                    | Potential Effect(s) of Failure              | Potential Sub-effect(s) of Failure                                       | Severity Potential Cause(s)/Mechanisms of Failure | Occurrence Current Controls - Prevention | Current Controls - Detection                | Detection RPN | Recommended Action*         |
|--------------------------------|-------------------------------------------|---------------------------------------------|--------------------------------------------------------------------------|---------------------------------------------------|------------------------------------------|---------------------------------------------|---------------|-----------------------------|
|                                |                                           | Overflow of Petri dish                      | Damage to device                                                         | 8 Material choice/interface technique             | 2 Material choice                        | Visual monitoring                           | 3 48          | None                        |
|                                |                                           |                                             | Loss of growth factor                                                    | 8 Material choice/interface technique             | 4 Material choice                        | Visual monitoring                           | 6 192         | Increase size of Petri dish |
|                                |                                           | Reduced flow through channel                | Not enough growth factor delivered to embryo during course of experiment | 6 Material choice/interface technique             | 2 Material choice                        | Sampling of reservoir concentrations        | 4 48          | None                        |
|                                |                                           |                                             | Too much growth factor diffuses to embryo                                | 7 Material choice/interface technique             | 3 Material choice                        | Sampling of reservoir concentrations        | 6 126         | Design improved interface   |
|                                | Degradation of epoxy/tubing interface     | Addition of new compounds to fishwater      | Unwanted embryo development changes                                      | 5 Degradation product alters embryo development   | 3 Material choice                        | Visual inspection of embryo post experiment | 8 120         | Use different epoxy         |
|                                |                                           |                                             | Embryo death                                                             | 8 Degradation product alters embryo development   | 3 Material choice                        | Visual monitoring                           | 5 120         | Use different epoxy         |
|                                |                                           | Change in media flow rate                   | Embryo dislodged                                                         | 4 Degradation product blocks tubing               | 3 Material choice                        | Visual monitoring                           | 4 48          | None                        |
|                                |                                           |                                             | Not enough nutrient/growth factor delivery                               | 6 Degradation product blocks tubing               | 3 Material choice                        | Sampling of reservoir concentrations        | 7 126         | Use different epoxy         |
|                                |                                           |                                             | Embryo death                                                             | 8 Degradation product blocks tubing               | 3 Material choice                        | Visual monitoring                           | 5 120         | Use different epoxy         |
| Collection Reservoir           | Leakage of media at tubing interface      | Damage to surrounding equipment             | Increased cost of operation                                              | 4 Material choice/interface operation             | 2 Material choice                        | Visual monitoring                           | 2 16          | None                        |
|                                | Absorption of solutes into container wall | Change in concentration of collection fluid | Unable to accurately analyze output                                      | 4 Material choice                                 | 2 Material choice                        | Sampling of reservoir concentrations        | 6 48          | None                        |
|                                |                                           |                                             | Reduced noggin recycling                                                 | 5 Material choice                                 | 2 Material choice                        | Sampling of reservoir concentrations        | 5 50          | None                        |
|                                | Degradation of epoxy/tubing interface     | Damage to surrounding equipment             | Increased cost of operation                                              | 4 Material choice                                 | 2 Material choice                        | Visual monitoring                           | 2 16          | None                        |
|                                |                                           | Change in concentration of collection fluid | Unable to accurately analyze output                                      | 4 Material choice                                 | 2 Material choice                        | Sampling of reservoir concentrations        | 4 32          | None                        |
|                                |                                           |                                             | Reduced noggin recycling                                                 | 4 Material choice                                 | 2 Material choice                        | Sampling of reservoir concentrations        | 4 32          | None                        |

\* No action is recommended for RPN values less than 100  
 \*\* Responsibility and Action Taken to be determined once device testing begins

SUPPLEMENTAL FIG. S1. (Continued)
